# Supplementary material for: Ultra-low temperature co-fired ceramics with adjustable microwave dielectric properties in the Na2O–Bi2O3–MoO3 ternary system: a comprehensive study
Source: Royal Society of Chemistry journal article supplement (doi:10.1039/d1tc05557g), 2022-01-01
Supplement: d1tc05557g1.pdf [file d1tc05557g1.pdf]

# **Ultra-low temperature co-fired ceramics with adjustable microwave dielectric properties in Na<sub>2</sub>O-Bi<sub>2</sub>O<sub>3</sub>-MoO<sub>3</sub> ternary system: A comprehensive study**

Shu-Zhao Hao,<sup>a</sup> Di Zhou,<sup>\*a</sup> Li-Xia Pang,<sup>b</sup> Ming-Zhao Dang,<sup>\*c</sup> Shi-Kuan Sun,<sup>d</sup> Tao Zhou,<sup>e</sup> Sergei Trukhanov,<sup>f,g,h</sup> Alex Trukhanov,<sup>f,g,h</sup> Antonio Sergio Bezerra Sombra,<sup>i</sup> Qiang Li,<sup>j</sup> Xiu-Qun Zhang,<sup>k</sup> Song Xia,<sup>a</sup> Moustafa Adel Darwish<sup>l</sup>

<sup>a</sup>Key Laboratory of Multifunctional Materials and Structures, Ministry of Education, School of Electronic Science and Engineering, Xi'an Jiaotong University, Xi'an 710049, Shaanxi, China

<sup>b</sup>Micro-optoelectronic Systems Laboratories, Xi'an Technological University, Xi'an, Shaanxi 710032, China

<sup>c</sup>Guangdong Fenghua Advanced Technology Holding Co., Ltd, Zhaoqing Guangdong, 526000, China

<sup>d</sup>School of Material Science and Energy Engineering, Foshan University, Foshan, Guangdong, 528000, China

<sup>e</sup>School of Electronic and Information Engineering, Hangzhou Dianzi University, Hangzhou, 310018, China

<sup>f</sup>National University of Science and Technology "MISiS", Leninskii Av., 4, Moscow, 4119049, Russia

<sup>g</sup>South Ural State University, Lenin Av., 76, Chelyabinsk, 454080, Russia

<sup>h</sup>Scientific and Practical Materials Research Center of the NAS of Belarus, P. BrovkiStr., 19, Minsk, 220072, Belarus

<sup>i</sup>Telecommunication Engineering Department, Federal University of Ceará (UFC), Fortaleza, Ceará 60755-640, Brazil; Telecommunication and Materials Science and

Engineering of Laboratory (LOCEM), Physics Department, Federal University of Ceará (UFC), Pici Campus, Fortaleza, Ceará 60455-760, Brazil

<sup>i</sup>ZTE Corporation, District Nanshan, Shenzhen, 518000, China

<sup>k</sup>ZTE Corporation, District Yuhuatai, Nanjing, 210012, China

<sup>l</sup>Physics Department, Faculty of Science, Tanta University, Al-Geish st., Tanta 31527, Egypt

\* Corresponding Author.

E-mail addresses: [zhoudi1220@gmail.com](mailto:zhoudi1220@gmail.com) (Di Zhou)

[dmzwt@qq.com](mailto:dmzwt@qq.com) (Ming-Zhao Dang)

Table S1 Values of parameters derived from the fitting of IR spectra of the  $0.4(\text{NaBi})_{0.5}\text{MoO}_4\text{-}0.6\text{Na}_2\text{MoO}_4$  ceramic

| Mode                        | $\omega_{oj}$ | $\omega_{pj}$ | $\gamma_j$             | $\Delta\varepsilon_j$ |
|-----------------------------|---------------|---------------|------------------------|-----------------------|
| 1                           | 68.33         | 118.00        | 31.09                  | 2.980                 |
| 2                           | 89.94         | 135.21        | 36.37                  | 2.260                 |
| 3                           | 130.79        | 139.18        | 32.32                  | 1.130                 |
| 4                           | 165.69        | 173.66        | 46.28                  | 1.100                 |
| 5                           | 219.18        | 158.29        | 51.95                  | 0.522                 |
| 6                           | 251.87        | 136.12        | 41.61                  | 0.292                 |
| 7                           | 298.60        | 166.36        | 54.49                  | 0.310                 |
| 8                           | 378.14        | 270.58        | 168.00                 | 0.512                 |
| 9                           | 384.70        | 52.52         | 24.17                  | 0.019                 |
| 10                          | 537.49        | 387.63        | 161.98                 | 0.520                 |
| 11                          | 631.41        | 385.56        | 120.11                 | 0.373                 |
| 12                          | 708.19        | 278.20        | 118.23                 | 0.154                 |
| 13                          | 820.53        | 188.65        | 18.65                  | 0.053                 |
| 14                          | 855.25        | 94.46         | 11.68                  | 0.012                 |
| 15                          | 900.64        | 56.29         | 8.57                   | 0.003                 |
| $\varepsilon_\infty = 1.83$ |               |               | $\varepsilon_0 = 12.1$ |                       |

Table S2 Values of parameters derived from the fitting of IR spectra of the  $0.8(\text{NaBi})_{0.5}\text{MoO}_4\text{-}0.2\text{Bi}_2\text{MoO}_6$  ceramic

| Mode                        | $\omega_{oj}$ | $\omega_{pj}$ | $\gamma_j$              | $\Delta\varepsilon_j$ |
|-----------------------------|---------------|---------------|-------------------------|-----------------------|
| 1                           | 56.26         | 62.72         | 3.02                    | 1.240                 |
| 2                           | 62.99         | 115.24        | 8.22                    | 3.350                 |
| 3                           | 83.28         | 335.92        | 34.38                   | 16.300                |
| 4                           | 87.62         | 43.24         | 4.74                    | 0.244                 |
| 5                           | 129.59        | 114.24        | 21.12                   | 0.777                 |
| 6                           | 142.15        | 85.16         | 14.06                   | 0.359                 |
| 7                           | 188.83        | 184.70        | 39.68                   | 0.960                 |
| 8                           | 258.72        | 229.21        | 42.21                   | 0.785                 |
| 9                           | 293.32        | 275.62        | 37.17                   | 0.883                 |
| 10                          | 326.45        | 104.83        | 23.73                   | 0.103                 |
| 11                          | 388.04        | 266.81        | 51.21                   | 0.473                 |
| 12                          | 470.31        | 171.93        | 34.19                   | 0.134                 |
| 13                          | 532.47        | 210.87        | 53.63                   | 0.157                 |
| 14                          | 567.08        | 151.78        | 27.38                   | 0.072                 |
| 15                          | 654.23        | 201.50        | 31.92                   | 0.095                 |
| 16                          | 715.57        | 758.61        | 79.00                   | 1.120                 |
| 17                          | 783.02        | 239.33        | 35.89                   | 0.093                 |
| 18                          | 809.40        | 265.61        | 31.67                   | 0.108                 |
| 19                          | 829.20        | 221.76        | 27.37                   | 0.072                 |
| 20                          | 853.13        | 104.61        | 20.01                   | 0.015                 |
| 21                          | 880.75        | 172.79        | 28.32                   | 0.039                 |
| 22                          | 902.97        | 76.12         | 14.53                   | 0.007                 |
| $\varepsilon_\infty = 3.21$ |               |               | $\varepsilon_0 = 27.46$ |                       |

Table S3 Values of parameters derived from the fitting of the IR spectra of  $0.5(\text{NaBi})_{0.5}\text{MoO}_4\text{-}0.5\text{Bi}_2\text{Mo}_2\text{O}_9$  ceramic

| Mode                        | $\omega_{oj}$ | $\omega_{pj}$ | $\gamma_j$              | $\Delta\varepsilon_j$ |
|-----------------------------|---------------|---------------|-------------------------|-----------------------|
| 1                           | 53.07         | 72.68         | 1.63                    | 1.880                 |
| 2                           | 62.30         | 254.89        | 12.30                   | 16.700                |
| 3                           | 68.40         | 49.57         | 1.89                    | 0.525                 |
| 4                           | 86.60         | 227.48        | 25.02                   | 6.900                 |
| 5                           | 131.15        | 232.08        | 72.04                   | 3.130                 |
| 6                           | 179.43        | 84.01         | 38.97                   | 0.219                 |
| 7                           | 254.37        | 133.11        | 27.39                   | 0.274                 |
| 8                           | 266.73        | 84.20         | 16.44                   | 0.100                 |
| 9                           | 280.06        | 47.31         | 10.24                   | 0.028                 |
| 10                          | 296.74        | 204.62        | 32.61                   | 0.467                 |
| 11                          | 334.36        | 153.42        | 26.67                   | 0.211                 |
| 12                          | 365.78        | 31.75         | 8.14                    | 0.007                 |
| 13                          | 385.06        | 219.99        | 52.54                   | 0.326                 |
| 14                          | 446.86        | 264.22        | 51.37                   | 0.350                 |
| 15                          | 482.62        | 191.63        | 38.42                   | 0.158                 |
| 16                          | 567.58        | 45.79         | 12.82                   | 0.006                 |
| 17                          | 705.22        | 279.44        | 31.76                   | 0.157                 |
| 18                          | 730.39        | 331.05        | 42.68                   | 0.205                 |
| 19                          | 780.54        | 727.44        | 129.43                  | 0.869                 |
| 20                          | 831.59        | 254.08        | 34.05                   | 0.093                 |
| 21                          | 894.62        | 90.88         | 15.72                   | 0.010                 |
| $\varepsilon_\infty = 2.17$ |               |               | $\varepsilon_0 = 32.64$ |                       |
